# Supplementary material for: Analysis of Balance during Functional Walking in Stroke Survivors
Source: PLOS journal article supplement (doi:10.1371/journal.pone.0166789), 2016-11-17
Supplement: S1 (10.1371/journal.pone.0166789.s001) [file journal.pone.0166789.s001]

|              | <u>Type</u> | <u>Size</u> |
|--------------|-------------|-------------|
| <b>DATA.</b> |             |             |
| → version    | string      |             |
| → comment    | string      |             |

↘ **information.**

|               |        |  |
|---------------|--------|--|
| → articleName | string |  |
| → publisher   | string |  |
| → authors     | string |  |
| → DOI         | string |  |

↘ **Participant( i ).**

**i = participant ID ( 1 to 10 )**

|              |        |           |
|--------------|--------|-----------|
| → sampleRate | double | ( 1 x 1 ) |
|--------------|--------|-----------|

↘ **info.**

|                  |        |           |
|------------------|--------|-----------|
| → Participant_ID | double | ( 1 x 1 ) |
| → Gender         | string |           |
| → DominantSide   | string |           |
| → AffectedSide   | string |           |

↘ **Age.**

|         |        |           |
|---------|--------|-----------|
| → unit  | string |           |
| → value | double | ( 1 x 1 ) |

↘ **PostStroke.**

|         |        |           |
|---------|--------|-----------|
| → unit  | string |           |
| → value | double | ( 1 x 1 ) |

↘ **Weight.**

|                          |        |           |
|--------------------------|--------|-----------|
| → unit                   | string |           |
| → value                  | double | ( 1 x 1 ) |
| → MeasuredWithShoe_unit  | string |           |
| → MeasuredWithShoe_value | double | ( 1 x 1 ) |

↘ **Height.**

|         |        |           |
|---------|--------|-----------|
| → unit  | string |           |
| → value | double | ( 1 x 1 ) |

↘ **BBS.**

|         |        |           |
|---------|--------|-----------|
| → name  | string |           |
| → unit  | string |           |
| → value | double | ( 1 x 1 ) |

↘ **TUG.**

|         |        |           |
|---------|--------|-----------|
| → name  | string |           |
| → unit  | string |           |
| → value | double | ( 1 x 2 ) |

↘ **TMW.**

|         |        |           |
|---------|--------|-----------|
| → name  | string |           |
| → unit  | string |           |
| → value | double | ( 1 x 1 ) |

**DATA.**

↳ **Participant( i ).**

**i = participant ID ( 1 to 10 )**

↳ **TUG\_DATA( t ).**

**t = trial number ( 1 or 2 )**

→ **TUG\_ID** double ( 1 x 1 )

↳ **Straight. or Turn.**

↳ **PAR.**

→ TurnAngle double ( n x 1 )  
→ vCoM double ( n x 3 )  
→ aCoM double ( n x 3 )  
→ GroundContactLeft double ( n x 1 )  
→ GroundContactRight double ( n x 1 )  
→ MoS\_AP double ( n x 1 )

**n = number of samples**

↳ **MoS\_ML.**

→ Right double ( n x 1 )  
→ Left double ( n x 1 )

↳ **POS.**

→ CoM double ( n x 3 )  
→ XCoM double ( n x 3 )

↳ **Left. or Right.**

→ Heel double ( n x 3 )  
→ Toe double ( n x 3 )  
→ ForceSensorHeel double ( n x 3 )  
→ ForceSensorForefoot double ( n x 3 )  
→ CoP double ( n x 3 )

↳ **F.**

↳ **Left. or Right.**

→ Heel double ( n x 3 )  
→ Forefoot double ( n x 3 )  
→ GRF double ( n x 3 )
